# Supplementary material for: Fucoxanthin Enhances Cisplatin-Induced Cytotoxicity via NFκB-Mediated Pathway and Downregulates DNA Repair Gene Expression in Human Hepatoma HepG2 Cells
Source: Mar Drugs. 2013 Jan 8;11(1):50–66. doi: 10.3390/md11010050 (PMC3564157; doi:10.3390/md11010050)

## Supplementary Information

**Figure S1.** Cell proliferation of HepG2 cells incubated with fucoxanthin (1–10  $\mu\text{M}$ ) for 24 h and 48 h. Values are means  $\pm$  SD,  $n = 3$ ; means without a common letter differ significantly,  $P < 0.05$ .

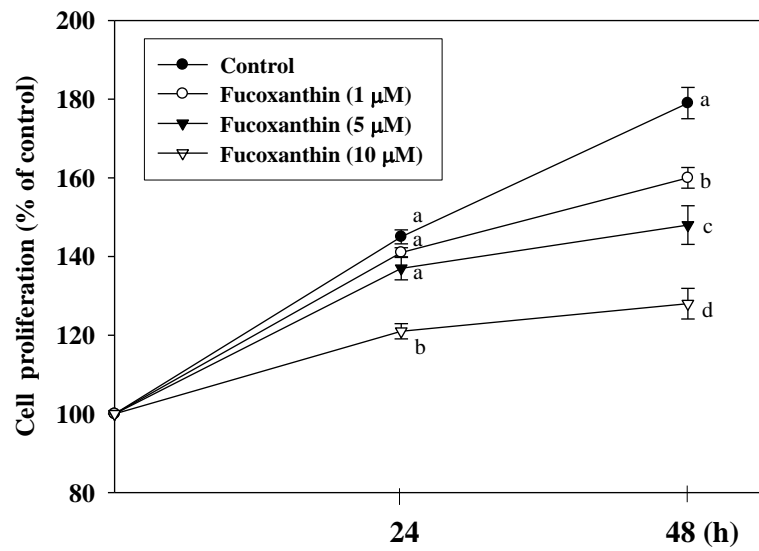

Supplement: Supplementary File 1 — Supplementary Information (PDF, 42 KB) [file marinedrugs-11-00050-s001.pdf]
